# Supplementary material for: 現代社会における社会福祉の一つの動向 : とくにコミュニティ・デベロップメントとの関連において ( 現代社会と社会福祉の課題)
Source: Springer Nature journal article supplement (doi:10.1186/s12872-021-02301-1), 1967-10-01
Supplement: MOESM2 [file 19744320]

|               | Random sequence generation (selection bias) | Allocation concealment (selection bias) | Blinding of participants and personnel (performance bias) | Blinding of outcome assessment (detection bias) | Incomplete outcome data (attrition bias) | Selective reporting (reporting bias) | Other bias |
|---------------|---------------------------------------------|-----------------------------------------|-----------------------------------------------------------|-------------------------------------------------|------------------------------------------|--------------------------------------|------------|
| Chen 2015     | ?                                           | -                                       | -                                                         | +                                               | -                                        | +                                    | ?          |
| Chen 2020     | +                                           | -                                       | -                                                         | -                                               | +                                        | -                                    | +          |
| Feng 2019     | +                                           | -                                       | -                                                         | ?                                               | +                                        | +                                    | +          |
| Fukuzawa 2000 | ?                                           | -                                       | -                                                         | ?                                               | +                                        | +                                    | ?          |
| Ikeda 2004    | ?                                           | -                                       | +                                                         | ?                                               | +                                        | +                                    | ?          |
| Ishii 2005    | ?                                           | +                                       | +                                                         | +                                               | +                                        | +                                    | ?          |
| Ito 1999      | ?                                           | -                                       | -                                                         | +                                               | +                                        | +                                    | ?          |
| Kitakaze 2007 | +                                           | +                                       | -                                                         | +                                               | +                                        | +                                    | +          |
| Lee 2008      | ?                                           | -                                       | -                                                         | ?                                               | +                                        | +                                    | ?          |
| Miyazawa 2006 | ?                                           | -                                       | -                                                         | +                                               | +                                        | +                                    | +          |
| Nameki 2004   | ?                                           | -                                       | -                                                         | +                                               | +                                        | +                                    | ?          |
| Ono 2004      | ?                                           | +                                       | -                                                         | +                                               | +                                        | +                                    | ?          |
| Ota 2006      | ?                                           | +                                       | -                                                         | +                                               | +                                        | +                                    | ?          |
| Ota 2006a     | ?                                           | +                                       | -                                                         | +                                               | +                                        | +                                    | ?          |
| Ota 2006b     | ?                                           | +                                       | -                                                         | +                                               | +                                        | +                                    | ?          |
| Pi 2019       | +                                           | -                                       | +                                                         | +                                               | +                                        | +                                    | +          |
| Pi 2019a      | +                                           | -                                       | +                                                         | +                                               | +                                        | +                                    | +          |
| Pi 2019b      | +                                           | -                                       | +                                                         | +                                               | +                                        | +                                    | +          |
| Qi 2018       | ?                                           | -                                       | -                                                         | ?                                               | +                                        | +                                    | +          |
| Wang 2017     | +                                           | -                                       | -                                                         | ?                                               | +                                        | +                                    | +          |
| Wang 2020     | +                                           | -                                       | -                                                         | -                                               | +                                        | -                                    | +          |
| Yamada 2015   | ?                                           | -                                       | +                                                         | +                                               | +                                        | +                                    | +          |
