# Supplementary material for: 現代社会における社会福祉の一つの動向 : とくにコミュニティ・デベロップメントとの関連において ( 現代社会と社会福祉の課題)
Source: Springer Nature journal article supplement (doi:10.1186/s12872-021-02301-1), 1967-10-01

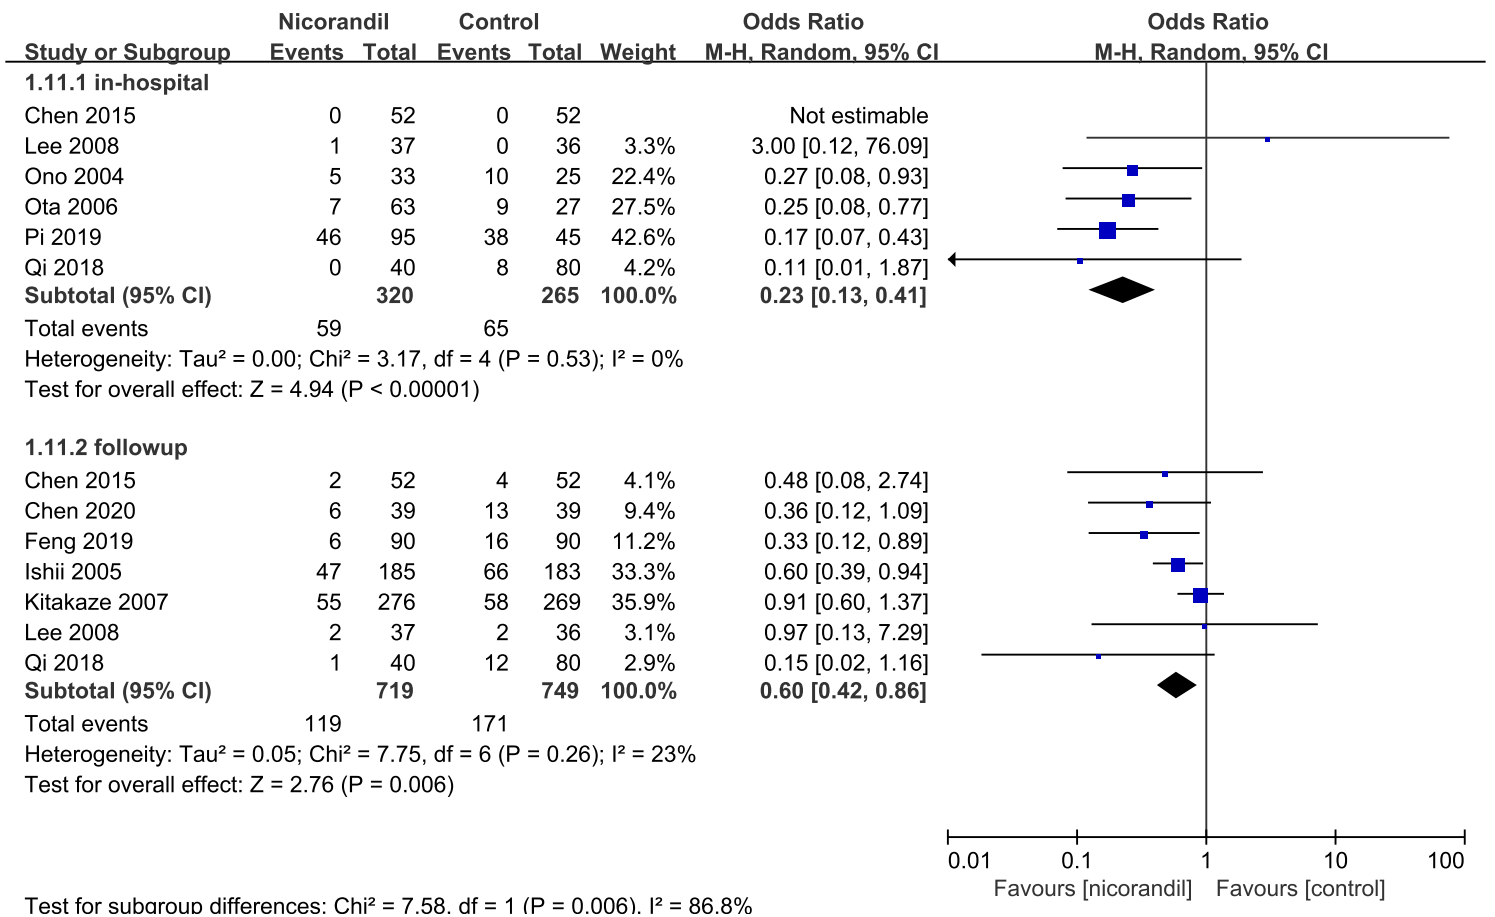

Supplement: MOESM4 [file 19744320]
